# Supplementary material for: Dynamic changes in copper homeostasis and post-transcriptional regulation of Atp7a during myogenic differentiation
Source: PubMed Central journal article supplement (PMC5824686; doi:10.1039/c7mt00324b), 2018-01-04
Supplement: MT-010-C7MT00324B-s001.pdf [file MT-010-C7MT00324B-s001.pdf]

## SUPPLEMENTARY INFORMATION

Dynamic changes in copper homeostasis and post-transcriptional regulation of *Atp7a* during myogenic differentiation

Katherine E. Vest, Amanda L. Paskavitz, Joseph B. Lee, Teresita Padilla-Benavides\*

## SUPPLEMENTARY FIGURES

### Supplementary Figure 1

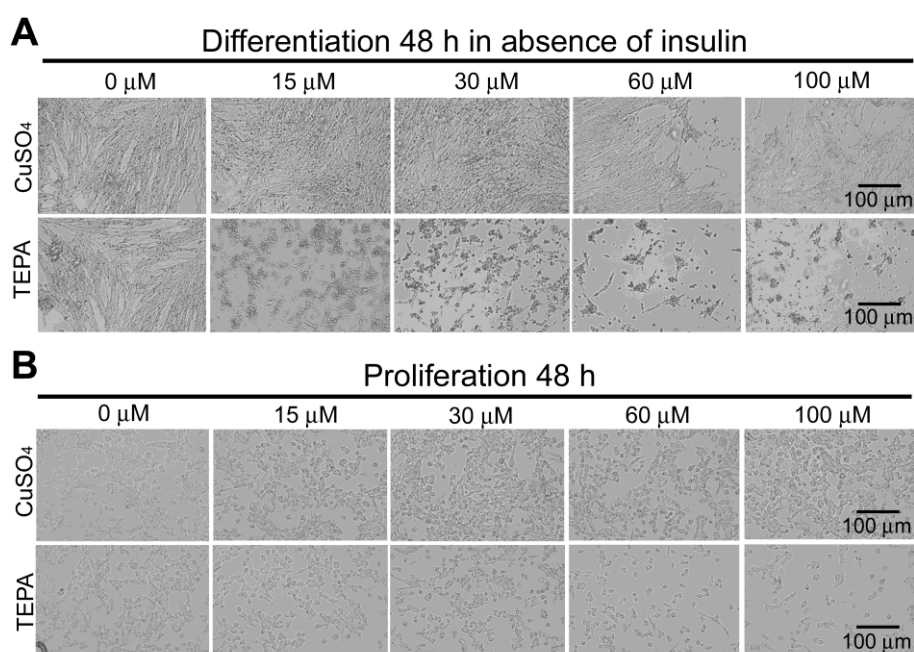

**Supp. Fig. 1. Effect of increasing concentrations of Cu in proliferating and differentiating primary myoblasts derived from murine satellite cells.** A. Representative light micrographs of myotubes differentiated for 48 h in insulin-depleted media with addition of increasing concentrations of  $\text{CuSO}_4$  (top) or TEPA (bottom). B. Representative light micrographs of proliferating myoblasts for 48 h cultured with increasing concentrations of  $\text{CuSO}_4$  (top) or TEPA (bottom).

## Supplementary Figure 2

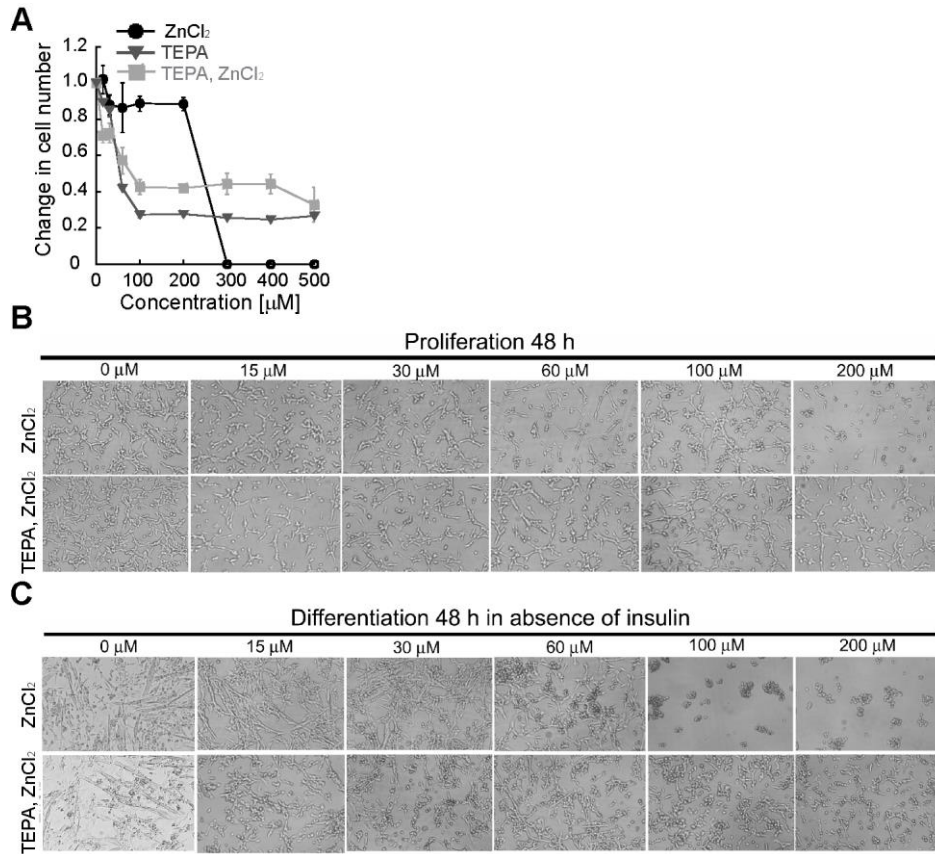

**Supp. Fig. 2. Effect of increasing concentrations of Zn in proliferating and differentiating primary myoblasts derived from murine satellite cells.** A. Cell counting assay of primary myoblasts grown under the same culture conditions as in panel A. Data represent the average of at least three independent experiments  $\pm$  SE. B. Representative light micrographs of proliferating myoblasts for 48 h cultured with increasing concentrations of ZnCl<sub>2</sub> (top) or TEPA treated cells supplemented with equimolar concentrations of ZnCl<sub>2</sub> (bottom). C. Representative light micrographs of myotubes differentiated for 48 h in insulin-depleted media with addition of increasing concentrations of ZnCl<sub>2</sub> (top) or TEPA treated cells supplemented with equimolar concentrations of ZnCl<sub>2</sub> (bottom).

### Supplementary Figure 3

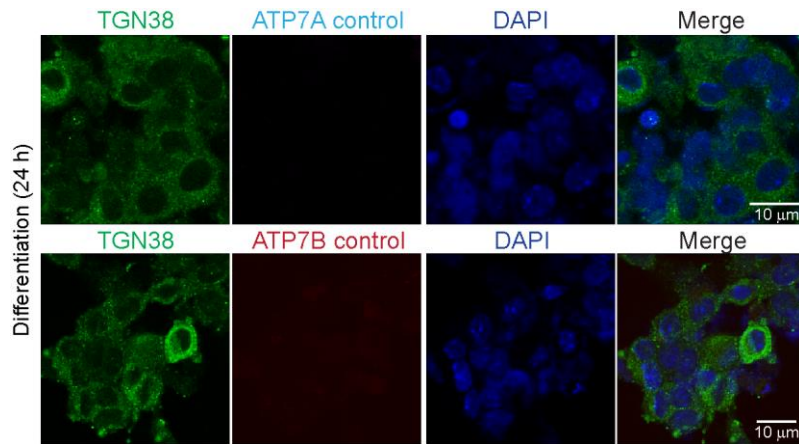

**Supp. Fig. 3. Negative controls for immunostaining and confocal microscopy.** Representative confocal micrographs of myoblasts differentiated for 24 h immunostained for TGN38. Primary antibodies against ATP7A or ATP7B were excluded from the mixture, and secondary antibodies were later included as a negative control.

## Supplementary Figure 4

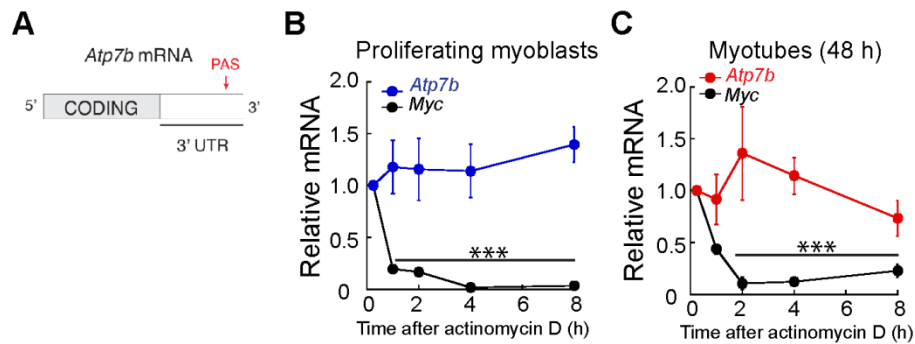

**Supp. Fig. 4. Stability of *Atp7b* mRNA does not change during myogenic differentiation.** A. Schematic of *Atp7b* 3' UTR showing the presence of only one PAS. B. *Atp7b* mRNA in proliferating myoblasts is stable as determined by actinomycin D treatment followed by qRT-PCR. Stability of *Myc* mRNA was used as a positive control. C. *Atp7b* mRNA in differentiated myotubes is stable as determined by actinomycin D treatment followed by qRT-PCR. Stability of *Myc* mRNA was used as a positive control. All data represent the average of three independent biological experiments  $\pm$  SE; \*\*\* $P < 0.001$ .

**Supplementary Table 1. Primers used in this study.**

| <b>Primer name</b>      | <b>Sequence 5'-3'</b>       | <b>Reference</b> |
|-------------------------|-----------------------------|------------------|
| <i>EF1α</i> F           | AGCTTCTCTGACTACCCTCCACTT    | (1)              |
| <i>EF1α</i> R           | GACCGTTCTTCCACCACTGATT      | (1)              |
| <i>Ctrl</i> F           | GGAATCCGCGGCCTTTACT         | This study       |
| <i>Ctrl</i> R           | TCAGTGGAAAAGTCTTCACA        | This study       |
| <i>Pax7</i> F           | GCAGCTGGAGGAGCTAGAGAAG      | (2)              |
| <i>Pax7</i> R           | GTCTCCTGGCTTGATGGAGTCG      | (2)              |
| <i>Myogenin</i> F       | CAAGTGTGCACATCTGTTCTAGTCTCT | (1)              |
| <i>Myogenin</i> R       | GTATCATCAGCACAGGAGACCTTGGT  | (1)              |
| <i>Mhcll</i> F          | TCAATGAGATGGAGATCCAGCTGAAC  | (1)              |
| <i>Mhcll</i> R          | GTCCAGGTGCAGCTGTGTGTCCTTC   | (1)              |
| <i>Act1</i> F           | TTGTGCGCGACATCAAAGAGAAGC    | (1)              |
| <i>Act1</i> R           | GAAACGCTCATTGCCGATGGTGAT    | (1)              |
| <i>Ckm</i> F            | GCCGGGGATGAGGAGTCCTAC       | (1)              |
| <i>Ckm</i> R            | GCAGTGCGGAGGCAGAGTGTA       | (1)              |
| <i>Atp7a</i> Coding F   | CCAAGGGTGTGACTGGTGTT        | This study       |
| <i>Atp7a</i> Coding R   | GGCACTCACCACAGATGGAA        | This study       |
| <i>Atp7a</i> Distal F   | TCATCCAGCCCCCTCTATCA        | This study       |
| <i>Atp7a</i> Distal R   | TCCTGACACAGCACGGATTT        | This study       |
| <i>Atp7a</i> Distal 2 F | GCGGGCAACTTTGTGCAATA        | This study       |
| <i>Atp7a</i> Distal 2 R | GCGGGCAACTTTGTGCAATA        | This study       |
| <i>Atp7b</i> F          | AGGAAGAACTTGGCGTCTGT        | This study       |
| <i>Atp7b</i> R          | CCAACATTGTCTGAAGGCGAA       | This study       |

## **SUPPLEMENTARY REFERENCES**

1. Hernandez-Hernandez, J. M., Mallappa, C., Nasipak, B. T., Oesterreich, S., and Imbalzano, A. N. (2013) The Scaffold attachment factor b1 (Safb1) regulates myogenic differentiation by facilitating the transition of myogenic gene chromatin from a repressed to an activated state. *Nucleic Acids Res* **41**, 5704-5716
2. Padilla-Benavides, T., Nasipak, B. T., and Imbalzano, A. N. (2015) Brg1 Controls the Expression of Pax7 to Promote Viability and Proliferation of Mouse Primary Myoblasts. *Journal of cellular physiology* **230**, 2990-2997
